# Supplementary material
Source: PubMed Central journal article supplement (PMC4159077)

## Supplementary materials

**Fig. 1 Attenuated diseases in *L. braziliensis*- or *L. major*-infected IFNAR<sup>-/-</sup> mice.** WT and IFNAR<sup>-/-</sup> mice (5 per group) were s.c. injected with  $2 \times 10^6$  *L. braziliensis* or *L. major* promastigotes in the hind foot. Lesion sizes were shown weekly for *L. braziliensis* (A) and for *L. major* (B). \*\* ( $p < 0.01$ ) indicates statistically significant difference between the two groups.

**Fig. 2 The expression of inflammatory cytokine and chemokine genes in *L. amazonensis*-infected tissues.** WT and IFNAR<sup>-/-</sup> mice were s.c. injected with  $1 \times 10^6$  *La* promastigotes in the inner side of the ear. The infected area from each ear were excised at 1 and 3 d post-infection and immediately frozen in liquid nitrogen. The expression of inflammatory cytokine and chemokine genes was analyzed by Oligo Microarray (OMM-011, SABiosciences) and normalized with non-infected controls. Genes with more than 2-fold increase are listed here.

**Fig. 3 The detection of three different subsets of peritoneal cells following injection with *L. amazonensis* parasites.** WT mice were i.p. injected with  $2 \times 10^7$  *La* promastigotes. Peritoneal cells were collected at 24 h post-infection and stained for Gr-1 and CD11b expression. Three different cell subsets were identified by FACS. Some cells were sorted, cytospun onto slides, and stained by a Diff-Quik assay.

**Fig. 4 Neutrophil and monocyte recruitment following injection with *L. major* parasites.** WT and IFNAR<sup>-/-</sup> mice (2 per group) were i.p. injected with  $2 \times 10^7$  *L. major* promastigotes. At 24 h post-infection, peritoneal cells were collected, stained with Ly-6G, Ly-6C and CD11b. The percentages of CD11b<sup>+</sup>Ly-6G<sup>+</sup> neutrophils and CD11b<sup>+</sup>Ly-6C<sup>+</sup> inflammatory monocytes from WT and IFNAR<sup>-/-</sup> mice were assayed by FACS. Shown are the representative results from two independent repeats.

**Fig. 5 The analyses of blood neutrophils and monocytes and lymph node monocytes during infection.** WT and IFNAR<sup>-/-</sup> mice were s.c. injected with  $1 \times 10^6$  *L. amazonensis* promastigotes in the inner side of the ear. (A) At 2 d post-infection, the percentages of blood neutrophils and monocytes were measured by FACS based on the expression of CD11b, Ly-6C and Ly-6G. The pooled data (3~4 mice per group) from two repeats were shown as mean  $\pm$  SD. (B) At 7 d post-infection, the percentages of CD11b<sup>high</sup>Ly-6C<sup>+</sup> monocytes and CD11b<sup>low</sup>Ly-6C<sup>+</sup> dendritic cells gated on CD11c<sup>+</sup> lymph node (LN) cells were measured by FACS. Shown are the representative results from two independent repeats.

**Fig. 6 Similar patterns of cytokine production from WT and IFNAR<sup>-/-</sup> neutrophils.** WT and IFNAR<sup>-/-</sup> mice were i.p. injected with  $2 \times 10^7$  *L. amazonensis* promastigotes. Peritoneal cells were collected at 6 h post-infection and restimulated with GolgiPlug for 4 h. The levels of intracellular cytokine (IFN- $\gamma$ , IL-10, TNF- $\alpha$ , and IL-12p40) in Ly-6G<sup>+</sup> neutrophils were analyzed by FACS. Shown are the representative results from three independent repeats.

**Fig. 7 Neutrophil apoptosis in *L. major* infection.** TG-elicited peritoneal neutrophils were purified from WT and IFNAR<sup>-/-</sup> mice and infected with *L. major* promastigotes in the absence or presence of IFN- $\alpha$  (200 U/ml) at the indicated cell-to-parasite ratios at 37°C for 18 h. Neutrophil apoptosis in Gr-1-gated cells were assayed by staining with Annexin V and 7-AAD, respectively. The numbers indicate the percentages of positively stained cells. Shown are the representative results from two independent repeats. Similar trends were observed for infection performed at 33°C (data not shown).

Fig. 1

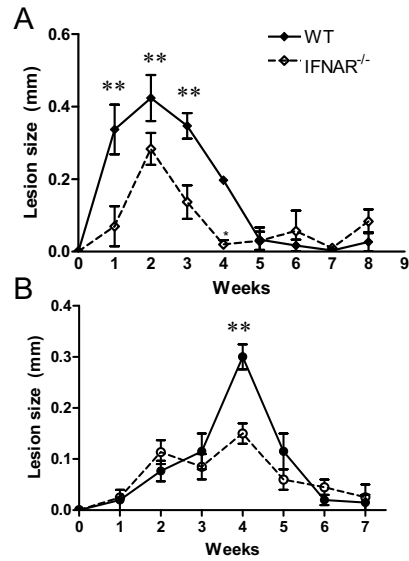

Fig. 2

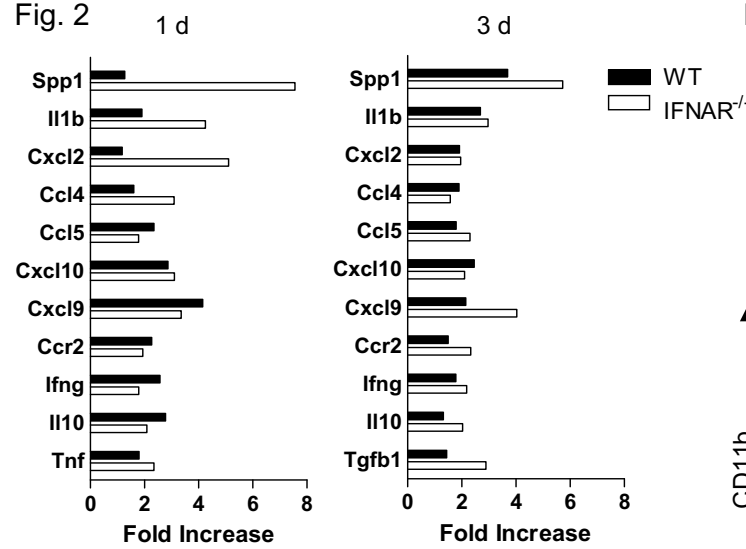

Fig. 3

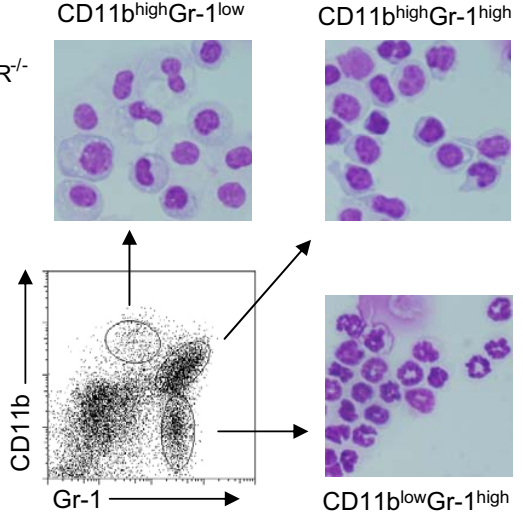

Fig. 4

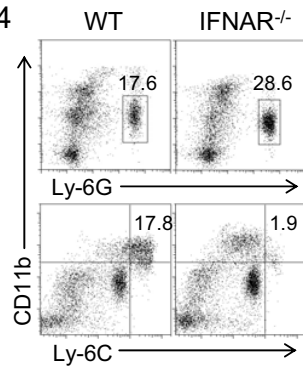

Fig. 5 A

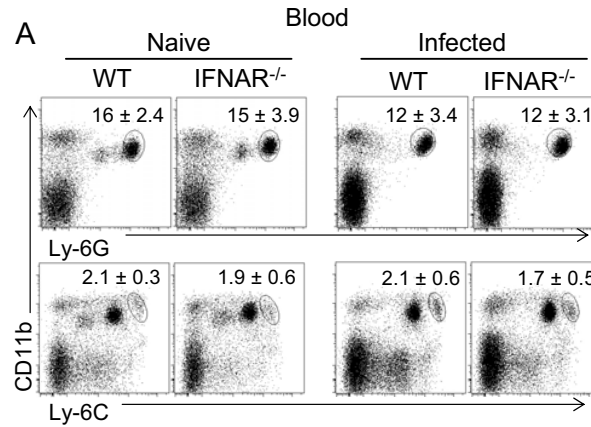

B

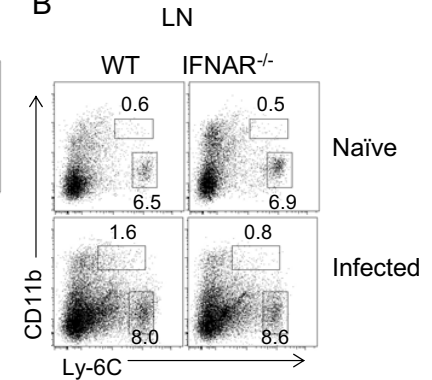

Fig. 6

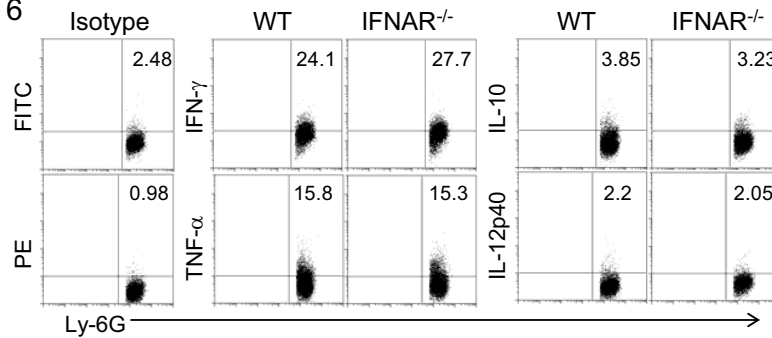

Fig. 7

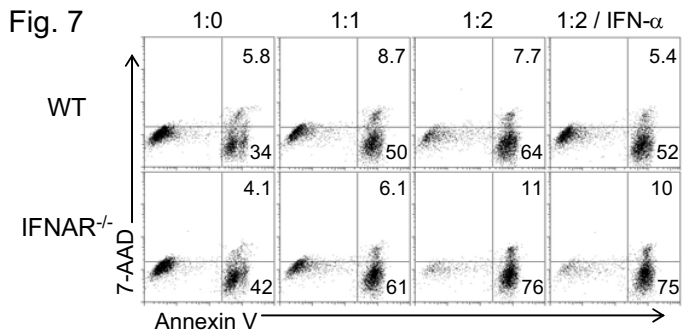

Supplement: NIHMS614861-supplement-Sup_data.pdf [file NIHMS614861-supplement-Sup_data.pdf]
